1 **Comprative evaluation of Advanced Oxidation Processes (AOPs) for reducing SARS-**  
2 **CoV-2 viral load from campus sewage water**

3 **Rinka Pramanik**<sup>a,#</sup>, **Narendra Bodawar**<sup>b,#</sup>, **Aashay Brahme**<sup>b</sup>, **Sanjay Kamble**<sup>b,\*</sup>,  
4 **Mahesh Dharne**<sup>a,\*</sup>

5 <sup>a</sup> National Collection of Industrial Microorganisms (NCIM), Biochemical Sciences Division,  
6 CSIR- National Chemical Laboratory (NCL), Pune, 411008, India

7 <sup>b</sup> Chemical Engineering and Process Development (CEPD) Division, CSIR- National  
8 Chemical Laboratory (NCL), Pune, 411008, India

9 <sup>#</sup> These authors contributed equally

10 \* Corresponding authors: Dr. Sanjay P. Kamble (Tel: +91-02025902732, E-mail:  
11 [sp.kamble@ncl.res.in](mailto:sp.kamble@ncl.res.in))

12 Dr. Mahesh S. Dharne (Tel: +9125902456, E-mail address: [ms.dharne@ncl.res.in](mailto:ms.dharne@ncl.res.in) (M.  
13 Dharne)

14 **Keywords**

15 AOPs, Hybrid AOPs, ozonation, Hydrodynamic cavitation, SARS-CoV-2, PMMoV, sewage  
16 water treatment

17 **Abstract**

18 Although the presence of SARS-CoV-2 fragments in raw sewage water are not much  
19 concerning, since it is a new pathogen and its fate in the environment is poorly understood;  
20 therefore efforts are needed for their effective removal. In under-developed countries with  
21 poor sewersheds and sanitation practices, the raw sewage water might come in contact with  
22 rivers and other water bodies and is generally used by the population for various purposes  
23 including drinking water. Hence it is important to properly treat sewage water to reduce

24 public health risks, if any. Our study evaluated various advanced oxidation processes (AOPs)  
25 for disinfection of SARS-CoV-2 from sewage water collected from the academic institutional  
26 residential campus. The present study is the first report showing hydrodynamic cavitation  
27 (HC) used to reduce the SARS-CoV-2 viral load from sewage water. Additionally, we have  
28 also evaluated hybrid techniques like HC/O<sub>3</sub>, HC/O<sub>3</sub>/H<sub>2</sub>O<sub>2</sub>, HC/H<sub>2</sub>O<sub>2</sub>, O<sub>3</sub>/UV, UV/H<sub>2</sub>O<sub>2</sub>,  
29 UV/H<sub>2</sub>O<sub>2</sub>/O<sub>3</sub>, and O<sub>3</sub>/H<sub>2</sub>O<sub>2</sub> for the minimization of the SARS-CoV-2 viral load from sewage  
30 water. The sewage water treatment techniques were evaluated based on its viral  
31 concentration-reducing efficiency by comparing it with the same raw sewage water sample.  
32 However, ozone alone and its combination with other disinfecting techniques (like HC, UV,  
33 and H<sub>2</sub>O<sub>2</sub>) showed >95% SARS-CoV-2 specific RNA-reducing efficiency (also known as  
34 viral load). The AOPs treated sewage water was subjected to total nucleic acid isolation  
35 followed by RT-qPCR for viral load estimation. Interestingly, all sewage water treatment  
36 techniques used in this study significantly reduces both the SARS-CoV-2 viral load as well  
37 as PMMoV (faecal indicator) load.

## 38 **1. Introduction**

39 The first detection of the SARS-CoV-2 virus responsible for causing COVID-19  
40 infection was found in Wuhan, China, in December 2019 (Jalali Milani and Nabi Bidhendi,  
41 2022; Kitajima et al., 2020; Serra-Compte et al., 2021). The COVID-19 outbreak was  
42 declared a public health emergency of international concern by the World Health  
43 Organization (WHO) on 30<sup>th</sup> January 2020. The SARS-CoV-2 virus is mainly transmitted  
44 through tiny respiratory droplets (Nasir et al., 2021). COVID-19-infected patients, both  
45 symptomatic as well as asymptomatic excrete the SARS-CoV-2 virus through faeces and  
46 other body secretion (sputum, saliva, urine) that are released via the restroom or lavatory and  
47 is introduced into the sewage treatment plant (STP) (Foladori et al., 2022; Gwenzi, 2021;  
48 Jalali Milani and Nabi Bidhendi, 2022; Serra-Compte et al., 2021) SARS-CoV-2 RNA can

49 survive in wastewater for around eight days, and it can remain inactive at 4° C for  
50 approximately 19 days (Beattie et al., 2022; Wang et al., 2005). Therefore, sewage water  
51 from the inlet of STPs can be used to extract SARS-CoV-2 viral RNA, and its presence and  
52 quantification can be determined using RT-qPCR. Wastewater-based epidemiology (WBE)  
53 estimates the prevalence of diseases and works as an early warning system for population-  
54 wide infectious diseases (Hellmér et al., 2014; Saguti et al., 2021; Sims and Kasprzyk-  
55 Hordern, 2020). It was already proven to be an effective tool during the Influenza A (H1N1)  
56 outbreak and other studies like the presence of Norovirus, Hepatitis A and E virus,  
57 adenovirus, and rotavirus (Hellmér et al., 2014).

58 The water released from the outlet of STPs plays an essential role in protecting public  
59 health as it has been used for irrigation, recreational purposes, or discharged in rivers  
60 (Foladori et al., 2022; Kokkinos et al., 2020). The presence of SARS-CoV-2 genetic material  
61 influences the quality of water in many ways. Such sewage water can cause many public  
62 health risks and environmental issues if released without proper treatment from STP's outlet  
63 to the environment. Hence, an effective treatment method for reducing viral load from  
64 sewage water is crucial for the environment (Foladori et al., 2020; Kokkinos et al., 2020;  
65 Serra-Compte et al., 2021). Many studies demonstrate the presence of SARS-CoV-2  
66 throughout the STPs as well as in treated wastewater around the globe like India, China,  
67 Paris, Germany, Japan, USA, Italy, and Spain (Betancourt et al., 2021; Giacobbo et al., 2021;  
68 Hellmér et al., 2014; Miyani et al., 2020; Serra-Compte et al., 2021; Sinclair et al., 2008;  
69 Spurbeck et al., 2021; Wang et al., 2005; Weidhaas et al., 2021). Primary or secondary STP  
70 treatments cannot wholly remove SARS-CoV-2 RNA from raw sewage water; hence tertiary  
71 or advanced treatment techniques must be investigated (Serra-Compte et al., 2021). As the  
72 primary treatment involves the removal of suspended solids, the complete removal of SARS-  
73 CoV-2 RNA is unachievable in this stage (Abu Ali et al., 2021). Besides, the virus can easily

74 survive the primary disinfection techniques because of their size; therefore, chemical  
75 disinfection is the alternate approach for eliminating viruses (Nasir et al., 2021). Mainly  
76 chlorine-based disinfection strategies are used to remove SARS-CoV-2 RNA from sewage  
77 water (Zhang et al., 2020). However, the generation of eco-toxic by-products, such as  
78 chloroform, halo acetic acids, and trihalomethanes, sets a significant limitation to this  
79 method. Other disinfecting techniques have their merits and demerits, as they are not equally  
80 effective for inactivating viral particles (Al-Hazmi et al., 2022; Gholipour et al., 2022; Rex  
81 and Chakraborty, 2022) Therefore, it is crucial to explore and develop a proper treatment  
82 strategy for contaminated sewage water in battling this kind of pandemic situation.

83       Advanced oxidation processes (AOPs) are the latest wastewater treatment techniques  
84 that efficiently disinfect viruses by generating oxidant species (Kokkinos et al., 2021). The  
85 fundamental mechanism for the degradation/disinfection of viruses by AOPs occurs via the  
86 generation of Hydroxyl ( $\text{OH}^\bullet$ ) radicals. Hydroxyl ( $\text{OH}^\bullet$ ) radical has an oxidising potential of  
87 2.8V (pH = 0) and 1.95V (pH 14) vs SCE (saturated calomel electrode, the most used  
88 reference electrode) (Tchobanoglous et al., n.d.). The  $\text{OH}^\bullet$  has a nonselective behaviour and  
89 reacts rapidly with a wide range of species, with rate constants in the  $10^8$ - $10^{10} \text{ M}^{-1} \text{ s}^{-1}$  range.  
90 Organic pollutants/ viruses get attacked by hydroxyl radicals via four fundamental  
91 mechanisms: radical combination, electron transfer, hydrogen abstraction and radical addition  
92 (Deng and Zhao, 2015). When hydroxyl radical reacts with organic compounds, they produce  
93 carbon-centred radicals (R or R-OH), which can be further converted to organic peroxy  
94 radicals (ROO) using  $\text{O}_2$ . All the radicals continue to react, forming more reactive species  
95 like  $\text{H}_2\text{O}_2$  and superoxide ( $\text{O}_2^\bullet$ ), which leads to the complete mineralisation of pollutants or  
96 disinfection of viruses from water bodies. The possible reaction mechanisms of each  
97 disinfecting technique have been summarised in Table 1.

98           This study aims to examine and evaluate advanced oxidation processes (AOPs) and  
99           their hybrid combinations for disinfecting SARS-CoV-2 from sewage water. The AOPs used  
100           in this study are ozonation, ultraviolet radiation (80 W lamp of wavelength 254 nm),  
101           hydrodynamic cavitation (HC), as well as their hybrid techniques like HC/O<sub>3</sub>, HC/O<sub>3</sub>/H<sub>2</sub>O<sub>2</sub>,  
102           HC/H<sub>2</sub>O<sub>2</sub>, O<sub>3</sub>/UV, UV/H<sub>2</sub>O<sub>2</sub>, UV/H<sub>2</sub>O<sub>2</sub>/O<sub>3</sub> and O<sub>3</sub>/H<sub>2</sub>O<sub>2</sub> for reducing the SARS-CoV-2 viral  
103           load from sewage water. The raw sewage water sample and AOPs treated sewage water  
104           samples were subjected to RT-qPCR to discern SARS-CoV-2 viral load. Subsequent  
105           comparison of the viral load of treated sewage water with that of raw sewage water, giving  
106           six best treatment techniques were shortlisted for further experimentation. Additionally, the  
107           effect of ozone dose on these above techniques was studied to establish the optimum ozone  
108           dose required. Further selected six best techniques were used to treat three distinct sewage  
109           water samples collected on different dates to validate their efficacy for disinfection of SARS-  
110           CoV-2 (Fig 1).

111           The sewage water treatment techniques would be most effective if they also reduce  
112           faecal matter and other enteric viruses from outlets of STPs. Therefore, during the final  
113           screening of raw sewage water treatment techniques, we also investigated the reduction of  
114           Pepper mild mottle virus (PMMoV). It is the most prevalent virus (up to 10<sup>9</sup> viruses/gram dry  
115           stool) in human faecal samples, as it is a plant virus with the dietary origin of humans from  
116           various pepper species (Rosario et al., 2009; Symonds et al., 2018; Zhang et al., 2006).  
117           Therefore, it is counted as a viral indicator of faecal contamination in sewage water because  
118           of its relatively stable nature and ability to move through the gut quickly (Rosario et al.,  
119           2009).

## 120           **2. Material and Methods**

### 121           **2.1 Experimental Setup**

### 122 2.1.1 Setup for Hydrodynamic cavitation and hybrid hydrodynamic cavitation technique

123 The experimental setup used for hydrodynamic cavitation and hybrid hydrodynamic  
124 cavitation for disinfection of SARS-CoV-2 from sewage water is shown in Fig. 2. The  
125 cavitation setup consists of an effluent holding tank (EHT) having a capacity of 5 litres, a  
126 centrifugal pump (P) power rating of 2 kW (CNP YE2-80M1-2: 2830 rpm, 415V, 50 Hz  
127 A.C.), ½ inch control valves (ball valves) and pressure gauges PG1 and PG2. The venturi  
128 throat diameter (6mm) and orifice (3 mm) are used as cavitation devices in the present setup.  
129 The sewage water was circulated from the EHT through the line consisting of a venturi or  
130 orifice device and back into the EHT using a positive displacement pump, and a bypass line  
131 was provided to control the circulation flow rate if required. The temperature of sewage water  
132 in the EHT tank is controlled by circulating the cold water through helical coils submerged in  
133 the EHT tank. The entire setup was fabricated using stainless steel 316. This experimental  
134 setup was used to disinfect SARS-CoV-2 from the sewage water using hydrodynamic  
135 cavitation and hybrid hydrodynamic cavitation techniques such as HC/O<sub>3</sub>, HC/O<sub>3</sub>/H<sub>2</sub>O<sub>2</sub>, and  
136 HC/H<sub>2</sub>O<sub>2</sub>.

### 137 2.1.2 Setup for Hybrid Photocatalytic and Ozonation processes

138 As shown in Fig. 3, an annular glass reactor comprising a quartz candle placed inside  
139 the annular glass reactor was used for disinfection of SARS-CoV-2 from raw sewage water.  
140 The volume of the glass reactor is 1 litre, with an annular effective volume of 500 ml. The  
141 disinfection of SARS-CoV-2 takes place in the annular volume formed between the glass  
142 reactor and the quartz candle placed in it. The required ozone flow is introduced from the  
143 bottom of the glass reactor through a ring air sparger. Ozone generator supplied by Ozonics  
144 India Ltd, Pune, India, was used in the present experimental work. It can be operated upto a  
145 maximum current of 3 A. The generator produces ozone using dry air as a feed gas. The

146 ozone generator was operated within a current range of 0.08 A to 0.15 A, producing ozone at  
147 a flow rate of 8 gm/hr and 15 gm/hr, respectively. The quartz candle is equipped with a  
148 cooling water inlet and outlet to maintain the temperature of the sewage water in the reactor.  
149 The hollow inner space inside the quartz candle is used to place the UV lamp. The UV lamp  
150 having 80 W capacity and wavelength of 254 nm was used.

## 151 **2.2 Sampling of sewage water sample and sampling site**

152 Raw sewage water samples were collected from the inlet of the Sewage Treatment  
153 Plant (Phytorid- STP) located at CSIR-National Chemical Laboratory (CSIR-NCL) campus,  
154 Pune, Maharashtra, India (18°32'31.2"N 73°48'43.2"E). The STP receives around 0.15 MLD  
155 of wastewater daily from Colony residents, hostel. Raw sewage water sample was collected  
156 following Standard Operating Procedure of wastewater surveillance by Center for disease  
157 control and prevention (CDC, USA) in a sterile container and stored at 4°C until it gets  
158 subjected to the following disinfection techniques. 20 litres of raw sewage water samples  
159 were collected for primary treatment and secondary treatment on 27<sup>th</sup> July 2022 and 18<sup>th</sup>  
160 September 2022, respectively. Whereas for evaluating the efficacy of the six best AOP  
161 techniques, three different sewage water samples (20 litres each) were collected on 30<sup>th</sup>  
162 August 2022, 1<sup>st</sup> September 2022, and 2<sup>nd</sup> September 2022.

## 163 **2.3 Treatment procedure**

### 164 **2.3.1 Hydrodynamic cavitation and hybrid hydrodynamic cavitation technique**

165 The known quantity of sewage water collected from STP was fed to the effluent  
166 holding tank (EHT), as shown in Fig. 2. The physiochemical characteristics like Total  
167 Organic Carbon (TOC), Total dissolved solids (TDS), Dissolve Oxygen (DO), and pH were  
168 estimated before and after AOPs treatment of raw sewage water. The sewage water was  
169 circulated from the EHT through the line consisting of a venturi device and back into the

170 EHT using a centrifugal pump. The known quantity of ozone gas was introduced at the  
171 venturi throat depending on the requirement of disinfection techniques. In the case of hybrid  
172 techniques such as ozonation/H<sub>2</sub>O<sub>2</sub>/HC and ozonation/HC ozone gas is induced at the venturi  
173 throat, while in the case of HC and HC/H<sub>2</sub>O<sub>2</sub> ozone gas is not induced. The sewage water was  
174 kept in recirculation mode for 90 min for treatment and the samples were taken and  
175 subsequently analysed for their physiochemical characteristics along with viral load. TOC  
176 also was measured using total organic carbon analyser TOC-L (Shimadzu model 00114). The  
177 pH, TDS, and DO were measured using electrodes provided by HANNA instruments  
178 (HI5521 and HI5522).

### 179 2.3.2 Ozonation and hybrid techniques

180 Fig. 3 shows a schematic of the annular glass reactor used for UV, ozonation, and hybrid  
181 techniques such as UV/ H<sub>2</sub>O<sub>2</sub>, UV/ozonation, UV/ozonation/ H<sub>2</sub>O<sub>2</sub>, and ozonation/ H<sub>2</sub>O<sub>2</sub>. A  
182 known quantity of sewage water (500 ml) was added to the annular glass reactor having an  
183 annular space volume of 1 litre. The UV lamp of 80 W, having a wavelength of 254 nm, is  
184 placed in the inner quartz tube hollow candle, which will be used for UV and hybrid  
185 techniques such as UV/H<sub>2</sub>O<sub>2</sub>, UV/ozonation, UV/ozonation/H<sub>2</sub>O<sub>2</sub>. The reaction temperature  
186 was constantly maintained by circulating the chilled water from the annular space between  
187 the lamp with the help of JULABO chiller FP-50 MA. The ozone gas with the desired flow  
188 rate was supplied through a ring sparger situated at the bottom of the reactor. The sewage  
189 water samples were taken from the reactor to estimate physiochemical characteristics and  
190 viral load. The disinfection experiment was performed for 90 min.

### 191 2.4 Isolation of Total Nucleic Acids

192 Wizard® Enviro Wastewater TNA kit (Promega Corp., USA) was used to purify  
193 Total Nucleic Acid (TNA) from the raw sewage water (unpasteurised) as well as AOPs



194 treated water samples at the same time to compare the difference in the viral concentration.  
195 TNA was isolated using the manufacturer protocol, which consists of 2 Steps: In the first  
196 step, TNA is captured on PureYield™ Midi Binding Column (Promega Corp., USA) and then  
197 eluted in 1 ml of pre-warmed (60°C) nuclease-free water (NFW); in the second one eluted  
198 TNA was further purified using a Mini spin column and concentrated in 40 µL volume.

## 199 **2.5 Viral Reverse Transcriptase-quantitative PCR assay (RT-qPCR)**

### 200 2.5.1 Quantification of SARS-CoV-2 RNA

201 The isolated TNA was subjected to SARS-CoV-2 RNA screening using GenePath Dx  
202 CoViDx One v2.1.1TK-Quantitative multiplex RT-qPCR kit (Achira Labs, India). This kit  
203 targets nucleocapsid (N), RNA-dependent RNA Polymerase (RdRp), and Envelope (E)  
204 regions of the SARS-CoV-2 genome along with human control gene (RNAase P). 15 µL of  
205 amplification reaction was composed of 10 µL of reaction master mix and 5 µL TNA. NFW  
206 was used as a no-template control (NTC), and extraction control was analysed with each  
207 plate. Experiments were performed on 7500 Fast Real-Time PCR system (Applied  
208 Biosystems, Foster City, USA) with the following cycling conditions: Pre-incubation for 5  
209 minutes at 37°C, Reverse transcription for 7 minutes at 52°C, R.T. inactivation for 3 minutes  
210 30 seconds at 95°C, and 40 cycles of denaturation at 5 seconds at 95°C and extension 35  
211 seconds at 35°C. RT-qPCR was performed in duplicates for each sample. The quantitation of  
212 the SARS-CoV-2 viral load in the samples was done using the Covid-19 Viral Load  
213 Calculation Tool (RUO).

### 214 2.5.2 Quantification of PMMoV RNA

215 Quantification of PMMoV RNA was screened using the GenePath Dx Wastewater  
216 monitoring for Covid-19 (RUO) (Achira Labs, India) on a 7500 Fast Real-Time PCR system  
217 (Applied Biosystems, Foster City, USA). Three standards of PMMoV (of concentration 5000

218 copies/ $\mu\text{L}$ , 500 copies/ $\mu\text{L}$ , 50 copies/ $\mu\text{L}$ ) were amplified along with experimental samples to  
219 construct a standard curve for PMMoV quantification. 5  $\mu\text{L}$  of extracted TNA was mixed  
220 with 10  $\mu\text{L}$  reaction master mix to make 15  $\mu\text{L}$  amplification reaction. 5  $\mu\text{L}$  of NFW was  
221 used as an NTC. Reactions were performed with the following cycling conditions: Pre-  
222 incubation for 5 minutes at 37°C, Reverse transcription for 7 minutes at 52°C, R.T.  
223 inactivation for 3 minutes 30 seconds at 95°C, and 40 cycles of denaturation at 5 seconds at  
224 95°C and extension 35 seconds at 35°C. RT-qPCR was performed in duplicates for each  
225 sample. The concentration of PMMoV was estimated using the standard curve.

### 226 **3. Results and Discussion**

227 SARS-CoV-2 viral load in sewage water started to rise from the first week of July  
228 2022. The escalated viral load in sewage water from the inlet of STP was needed to evaluate  
229 the best sewage water treatment techniques. Therefore, these experiments were accomplished  
230 from August 2022 to September 2022, when the viral load of sewage water was elevated. The  
231 disinfecting techniques like hydrodynamic cavitation (HC), UV and ozonation, as well as  
232 their hybrid combinations like HC/O<sub>3</sub>, HC/O<sub>3</sub>/H<sub>2</sub>O<sub>2</sub>, HC/H<sub>2</sub>O<sub>2</sub>, O<sub>3</sub>/UV, UV/H<sub>2</sub>O<sub>2</sub>,  
233 UV/H<sub>2</sub>O<sub>2</sub>/O<sub>3</sub> and O<sub>3</sub>/H<sub>2</sub>O<sub>2</sub> for reducing the SARS-CoV-2 viral load from sewage water, were  
234 used in this study. The experiments were divided into three parts: 1) Primary screening of  
235 AOPs and hybrid AOPs, 2) Variation of ozone dose for optimum efficiency, 3) Treatment of  
236 three different sewage water samples using selected six best AOP techniques.

237 Around ten AOPs, including hybrids techniques were screened for effective  
238 disinfection of the SARS-CoV-2 from raw sewage water (Fig. 4). The ozone flow rate of 8  
239 gm/hr during the initial screening was kept constant. TNA was isolated from a sewage water  
240 sample (raw and treated) and subjected to RT-qPCR, which were analysed by cycle threshold  
241 (Ct) and viral load. AOP treated sewage water having Ct value < 35 for any two target genes

242 of SARS-CoV-2 were considered SARS-CoV-2 Positive (according to the kit's instruction),  
243 and they were less efficient in reducing SARS-CoV-2 from sewage water (Supplementary  
244 Table: 1).

245 The viral load of raw sewage water used in the initial screening was 382 copies/ $\mu$ L.  
246 During the initial screening, UV was used as one of the disinfection techniques because it can  
247 eradicate biological pollutants from wastewater (Darnell et al., 2004; Parsa et al., 2021) and  
248 SARS-CoV-2 from infected surfaces like doors and handles of windows (Hadi et al., 2020;  
249 Kuzniewski, 2021). UV light of wavelength 254 nm was used in the treatment process as it is  
250 widely used for disinfection purposes (Singh et al., 2021). Therefore, eradication of SARS-  
251 CoV-2 RNA was done by exposing sewage water to UV for 90 minutes, giving a 75.5%  
252 reduction in RNA concentration which is 105 copies/ $\mu$ L. SARS-CoV-2 RNA was reduced to  
253 86.7 copies/ $\mu$ L with disinfecting efficiency of 77.3% when UV was combined with hydrogen  
254 peroxide (400 mg/l); the synergetic effect of the combination of UV/H<sub>2</sub>O<sub>2</sub> lead to more  
255 generation of hydroxyl radical which resulted in high disinfecting efficiency (Ibrahim et al.,  
256 2021). Dular et al., 2016 studied sewage water treatment using hydrodynamic cavitation  
257 technique and found that it reduces waterborne enteric viruses from sewage water treatment  
258 plants. Similarly, Bui et al., 2019 also investigated HC as an efficient and economical  
259 treatment technique that generates no by-products. In the present study, HC treatment of  
260 sewage water for 90 minutes scaled down the SARS-CoV-2 RNA viral load to 12.2  
261 copies/ $\mu$ L with 96.80% disinfecting efficiency. But when HC was combined with hydrogen  
262 peroxide (400 mg/l) and Ozone (8 gm/hr) to treat the sewage water, the RNA concentration  
263 was reduced to 10.4 copies/ $\mu$ L and 6.71 copies/ $\mu$ L, respectively. Besides this, a hybrid of  
264 HC, ozone (8 gm/hr), and hydrogen peroxide (400 gm/l) brought the SARS-CoV-2 RNA  
265 concentration down to 3.7 copies/ $\mu$ L with 99.02% disinfecting efficiency because the  
266 combination of HC with other AOPs are more effective for sewage water treatment as the

267 number of hydroxyl radical generated are more due to the addition of hydrogen peroxide and  
268 ozone. (Gogate et al., 2020; Thanekar and Gogate, 2019). To the best of our knowledge, this  
269 is the first study to implicate hydrodynamic cavitation for reducing SARS-CoV-2 viral load  
270 from sewage water. SARS-CoV-2 RNA concentration in sewage water was scaled down to  
271 1.66 copies/ $\mu$ L when treated with ozone at an 8 gm/hr flow rate for 90 minutes. The  
272 combination of ozone (8 gm/hr) with UV and hydrogen peroxide (400 mg/l) was also used to  
273 treat sewage water, resulting in the diminution of SARS-CoV-2 RNA concentration to 0.984  
274 copies/ $\mu$ L and 1.21 copies/ $\mu$ L, respectively. In addition, a hybrid treatment of ozone (8  
275 gm/hr), UV and hydrogen peroxide (400 mg/l) was also used to treat sewage water and  
276 decline the SARS-CoV-2 RNA concentration to 1.13 copies/ $\mu$ L. All ozone and ozone based  
277 AOPs sewage water techniques shown more than 99.00% disinfecting capability, as it is  
278 highly reactive to viruses because of its oxidising property, and it can eradicate enveloped as  
279 well as non-enveloped viruses (Martins et al., 2021; Murray et al., 2008; Thanekar and  
280 Gogate, 2019; Young et al., 2020).

281 Variations of ozone dose were given to the six most effective techniques from the  
282 primary screening. Two variations were designed 8 gm ozone/hr and 15 gm ozone/hr for 90  
283 minutes. In this screening, ozonation/UV, ozonation/UV/H<sub>2</sub>O<sub>2</sub>, HC/ozonation, and  
284 ozonation/HC/H<sub>2</sub>O<sub>2</sub> proved to be most effective when the ozone dose was 15 gm/hr (Fig. 5).  
285 The ozone flow rate of 8 gm/hr worked best for ozonation and ozonation/ H<sub>2</sub>O<sub>2</sub>. However,  
286 both ozone flow rate gives a desirable reduction in the SARS-CoV-2 RNA concentration  
287 (Fig. 5). These six best AOP techniques were further tried to treat three different sewage  
288 water samples collected on different days. The purpose of the treatment of three different  
289 sewage water samples was to certify the efficacy and consistency of all selected six best AOP  
290 techniques for the reduction of SARS-CoV-2 RNA concentration. It was found that all

291 treatment techniques show SARS-CoV-2 RNA viral load reduction to the desired level (Fig.  
292 6).

293 Additionally, PMMoV RNA reduction was also evaluated for the three different  
294 sewage water samples collected on different days using the six best AOP techniques.  
295 PMMoV is the most abundant RNA virus in human faeces and an indicator of faecal  
296 contamination (Rosario et al., 2009). GenePathDx Wastewater monitoring for Covid-19  
297 (RUO) (Achira Labs, India) was used to evaluate PMMoV RNA reduction and compared  
298 with raw sewage water sample (Fig. 7). PMMoV RNA was more than 1900 copies/ $\mu$ L in raw  
299 sewage water got reduced to <600 copies/ $\mu$ L after AOPs treatment, hence we can say that  
300 these treatment techniques are also effective in reducing the faecal contamination along with  
301 SARS-CoV-2 RNA from sewage water (Canh et al., 2022).

302 The physicochemical characteristics of raw sewage water before and after the AOPs  
303 were estimated and shown in Table 2. The TOC of the treated sewage water decreases from  
304 27 mg/L to below 5 mg/L for all treatment techniques (Table 2). This reflects a direct  
305 correlation between reduction in SARS-CoV-2 RNA, PMMoV, and other microbes in the  
306 sewage water and reduction in total organic carbon load as all these viruses and bacteria  
307 contain organic carbons (Li et al., 2022; Yu et al., 2022). Also, the dissolved oxygen (DO)  
308 level of treated sewage water has increased from 5 mg/L to 15 mg/L, which is a good  
309 indicator of water quality. Aquatic life depends on sufficient oxygen to live; hence, a drop in  
310 dissolved oxygen below the limit will result in the loss of fish and plants. Therefore, water  
311 quality can be estimated by measuring dissolved oxygen level. As per the Environmental  
312 Protection Agency (EPA) guideline, if dissolved oxygen concentration reaches 3 mg/L, it is  
313 considered to be danger zone for aquatic life and levels below 1 mg/L are unfavourable to  
314 aquatic life, whereas dissolved oxygen level concentration 8-9 mg/L support all aquatic life  
315 (fish and plants) (“Indicators: Dissolved Oxygen | US EPA,” 2022; Sofia, 2020). The above

316 AOPs were performed for the first time to reduce SARS-CoV-2 from sewage water, and  
317 further studies are essential to implement these techniques for the treatment of sewage water  
318 at actual STP.

### 319 **Conclusions**

320 This is the first study showing the effective use of AOPs, including hydrodynamic  
321 cavitation (HC), ozonation, and hybrid AOPs shows more than 95% SARS-CoV-2 virus  
322 reduction. It was also found that ozone and ozone based hybrid AOPs techniques showed  
323 99% effectiveness in disinfecting SARS-CoV-2. These AOP techniques were also found to  
324 effectively reduce PMMoV RNA concentration, a faecal indicator from sewage water.  
325 Although this is a preliminary study with a limited number of samples, the observations and  
326 experimental evidence highlighted the importance of AOP techniques in reducing SARS-  
327 CoV-2 viral load in sewage water. The results of our investigation could be instrumental for  
328 further studies dealing with the prospection of AOPs for the reduction of other viruses and  
329 pathogens from the sewage water.

### 330 **Competing interest**

331 The authors declare that they have no known competing financial interests or personal  
332 relationships that could have appeared to influence the work reported in this paper.

### 333 **Acknowledgements**

334 Authors are thankful to the Director, CSIR National Chemical Laboratory for support. This  
335 work funded by CSIR through project E3OW (MLP102326B) and National Chemical  
336 Laboratory, Pune (MLP 038526). Authors would like to express thanks to Engineering  
337 Division of National Chemical Laboratory for support during sample collection. Manuscript  
338 has been checked for plagiarism using iThenticate licensed version.

339 **References**

- 340 Abu Ali, H., Yaniv, K., Bar-Zeev, E., Chaudhury, S., Shagan, M., Lakkakula, S., Ronen,  
341 Z., Kushmaro, A., Nir, O., 2021. Tracking SARS-CoV-2 RNA through the  
342 wastewater treatment process. *ACS ES&T Water* 1, 1161–1167.
- 343 Al-Hazmi, H.E., Shokrani, H., Shokrani, A., Jabbour, K., Abida, O., Mousavi Khadem,  
344 S.S., Habibzadeh, S., Sonawane, S.H., Saeb, M.R., Bonilla-Petriciolet, A., Badawi,  
345 M., 2022. Recent advances in aqueous virus removal technologies. *Chemosphere*  
346 305, 135441. <https://doi.org/https://doi.org/10.1016/j.chemosphere.2022.135441>
- 347 Beattie, R.E., Blackwood, A.D., Clerkin, T., Dinga, C., Noble, R.T., 2022. Evaluating  
348 the impact of sample storage, handling, and technical ability on the decay and  
349 recovery of SARS-CoV-2 in wastewater. *PLoS One* 17, e0270659.
- 350 Betancourt, W.Q., Schmitz, B.W., Innes, G.K., Prasek, S.M., Brown, K.M.P., Stark,  
351 E.R., Foster, A.R., Sprissler, R.S., Harris, D.T., Sherchan, S.P., 2021. COVID-19  
352 containment on a college campus via wastewater-based epidemiology, targeted  
353 clinical testing and an intervention. *Science of The Total Environment* 779,  
354 146408.
- 355 Bui, X.-T., Chiemchaisri, C., Fujioka, T., Varjani, S., 2019. Introduction to recent  
356 advances in water and wastewater treatment technologies. *Water and wastewater  
357 treatment technologies* 3–12.
- 358 Canh, V.D., Lien, N.T., Nga, T.T.V., 2022. Evaluation of the suitability of pepper mild  
359 mottle virus (PMMoV) as an indicator virus for water safety and quality. *Journal of  
360 Science and Technology in Civil Engineering (STCE)-HUCE* 16, 76–88.

- 361 Darnell, M.E.R., Subbarao, K., Feinstone, S.M., Taylor, D.R., 2004. Inactivation of the  
362 coronavirus that induces severe acute respiratory syndrome, SARS-CoV. *J Virol*  
363 *Methods* 121, 85–91.
- 364 Deng, Y., Zhao, R., 2015. Advanced oxidation processes (AOPs) in wastewater  
365 treatment. *Curr Pollut Rep* 1, 167–176.
- 366 Dular, M., Griessler-Bulc, T., Gutierrez-Aguirre, I., Heath, E., Kosjek, T., Klemenčič,  
367 A.K., Oder, M., Petkovšek, M., Rački, N., Ravnikar, M., 2016. Use of  
368 hydrodynamic cavitation in (waste) water treatment. *Ultrason Sonochem* 29, 577–  
369 588.
- 370 Foladori, P., Cutrupi, F., Cadonna, M., Manara, S., 2022. Coronaviruses and SARS-  
371 CoV-2 in sewerage and their removal: Step by step in wastewater treatment plants.  
372 *Environ Res* 207, 112204.
- 373 Foladori, P., Cutrupi, F., Segata, N., Manara, S., Pinto, F., Malpei, F., Bruni, L., la Rosa,  
374 G., 2020. SARS-CoV-2 from faeces to wastewater treatment: What do we know? A  
375 review. *Science of the Total Environment* 743.  
376 <https://doi.org/10.1016/j.scitotenv.2020.140444>
- 377 Gholipour, S., Ghalhari, M.R., Nikaeen, M., Rabbani, D., Pakzad, P., Miranzadeh, M.B.,  
378 2022. Occurrence of viruses in sewage sludge: A systematic review. *Science of the*  
379 *Total Environment* 153886.
- 380 Giacobbo, A., Rodrigues, M.A.S., Ferreira, J.Z., Bernardes, A.M., de Pinho, M.N., 2021.  
381 A critical review on SARS-CoV-2 infectivity in water and wastewater. What do we  
382 know? *Science of the Total Environment* 774, 145721.



- 383 Gogate, P.R., Thanekar, P.D., Oke, A.P., 2020. Strategies to improve biological  
384 oxidation of real wastewater using cavitation based pre-treatment approaches.  
385 Ultrason Sonochem 64, 105016.
- 386 Gwenzi, W., 2021. Leaving no stone unturned in light of the COVID-19 faecal-oral  
387 hypothesis? A water, sanitation and hygiene (WASH) perspective targeting low-  
388 income countries. Science of the Total Environment 753, 141751.
- 389 Hadi, J., Dunowska, M., Wu, S., Brightwell, G., 2020. Control measures for SARS-  
390 CoV-2: a review on light-based inactivation of single-stranded RNA viruses.  
391 Pathogens 9, 737.
- 392 Hellmér, M., Paxéus, N., Magnius, L., Enache, L., Arnholm, B., Johansson, A.,  
393 Bergström, T., Norder, H., 2014. Detection of pathogenic viruses in sewage  
394 provided early warnings of hepatitis A virus and norovirus outbreaks. Appl Environ  
395 Microbiol 80, 6771–6781.
- 396 Ibrahim, Y., Ouda, M., Kadadou, D., Banat, F., Naddeo, V., Alsafar, H., Yousef, A.F.,  
397 Barceló, D., Hasan, S.W., 2021. Detection and removal of waterborne enteric  
398 viruses from wastewater: a comprehensive review. J Environ Chem Eng 9, 105613.
- 399 Indicators: Dissolved Oxygen | US EPA [WWW Document], 2022. URL  
400 [https://www.epa.gov/national-aquatic-resource-surveys/indicators-dissolved-](https://www.epa.gov/national-aquatic-resource-surveys/indicators-dissolved-oxygen)  
401 [oxygen](https://www.epa.gov/national-aquatic-resource-surveys/indicators-dissolved-oxygen) (accessed 11.14.22).
- 402 Jalali Milani, S., Nabi Bidhendi, G., 2022. A Review on the Potential of Common  
403 Disinfection Processes for the Removal of Virus from Wastewater. Int J Environ  
404 Res 16, 1–11.

- 405 Kitajima, M., Ahmed, W., Bibby, K., Carducci, A., Gerba, C.P., Hamilton, K.A.,  
406 Haramoto, E., Rose, J.B., 2020. SARS-CoV-2 in wastewater: State of the  
407 knowledge and research needs. *Science of the Total Environment*.  
408 <https://doi.org/10.1016/j.scitotenv.2020.139076>
- 409 Kokkinos, P., Mantzavinos, D., Venieri, D., 2020. Current trends in the application of  
410 nanomaterials for the removal of emerging micropollutants and pathogens from  
411 water. *Molecules* 25, 2016.
- 412 Kokkinos, P., Venieri, D., Mantzavinos, D., 2021. Advanced oxidation processes for  
413 water and wastewater viral disinfection. A systematic review. *Food Environ Virol*  
414 13, 283–302.
- 415 Kuzniewski, S., 2021. Prevalence, environmental fate, treatment strategies, and future  
416 challenges for wastewater contaminated with SARS-CoV-2. *Remediation Journal*  
417 31, 97–110.
- 418 Li, H., Xu, Y., Zheng, X., Tan, L., Cheng, W., Zhang, C., Wang, Q., Yang, B., Gao, Y.,  
419 2022. Optimising mixed aerobic and anaerobic composting process parameters for  
420 reducing bacterial pathogenicity in compost-derived products. *J Environ Manage*  
421 304, 114293. <https://doi.org/10.1016/j.jenvman.2021.114293>
- 422 Martins, R.B., Castro, I.A., Pontelli, M., Souza, J.P., Lima, T.M., Melo, S.R., Siqueira,  
423 J.P.Z., Caetano, M.H., Arruda, E., de Almeida, M.T.G., 2021. SARS-CoV-2  
424 inactivation by ozonated water: a preliminary alternative for environmental  
425 disinfection. *Ozone Sci Eng* 43, 108–111.
- 426 Miyani, B., Fonoll, X., Norton, J., Mehrotra, A., Xagorarakis, I., 2020. SARS-CoV-2 in  
427 Detroit wastewater. *Journal of Environmental Engineering* 146, 06020004.

- 428 Murray, B.K., Ohmine, S., Tomer, D.P., Jensen, K.J., Johnson, F.B., Kirsi, J.J., Robison,  
429 R.A., O'Neill, K.L., 2008. Virion disruption by ozone-mediated reactive oxygen  
430 species. *J Virol Methods* 153, 74–77.
- 431 Nasir, A.M., Awang, N., Hubadillah, S.K., Jaafar, J., Othman, M.H.D., Salleh, W.N.W.,  
432 Ismail, A.F., 2021. A review on the potential of photocatalysis in combatting  
433 SARS-CoV-2 in wastewater. *Journal of Water Process Engineering* 42, 102111.
- 434 Parsa, S.M., Momeni, S., Hemmat, A., Afrand, M., 2021. Effectiveness of solar water  
435 disinfection in the era of COVID-19 (SARS-CoV-2) pandemic for contaminated  
436 water/wastewater treatment considering UV effect and temperature. *Journal of*  
437 *Water Process Engineering* 43, 102224.
- 438 Rex, K.R., Chakraborty, P., 2022. Legacy and new chlorinated persistent organic  
439 pollutants in the rivers of south India: Occurrences, sources, variations before and  
440 after the outbreak of the COVID-19 pandemic. *J Hazard Mater* 437, 129262.  
441 <https://doi.org/https://doi.org/10.1016/j.jhazmat.2022.129262>
- 442 Rosario, K., Symonds, E.M., Sinigalliano, C., Stewart, J., Breitbart, M., 2009. Pepper  
443 mild mottle virus as an indicator of fecal pollution. *Appl Environ Microbiol* 75,  
444 7261–7267.
- 445 Saguti, F., Magnil, E., Enache, L., Churqui, M.P., Johansson, A., Lumley, D.,  
446 Davidsson, F., Dotevall, L., Mattsson, A., Trybala, E., Lagging, M., Lindh, M.,  
447 Gisslén, M., Brezicka, T., Nyström, K., Norder, H., 2021. Surveillance of  
448 wastewater revealed peaks of SARS-CoV-2 preceding those of hospitalized  
449 patients with COVID-19. *Water Res* 189.  
450 <https://doi.org/10.1016/j.watres.2020.116620>

- 451 Serra-Compte, A., González, S., Arnaldos, M., Berlendis, S., Courtois, S., Loret, J.F.,  
452 Schlosser, O., Yanez, A.M., Soria-Soria, E., Fittipaldi, M., 2021. Elimination of  
453 SARS-CoV-2 along wastewater and sludge treatment processes. *Water Res* 202,  
454 117435.
- 455 Sims, N., Kasprzyk-Hordern, B., 2020. Future perspectives of wastewater-based  
456 epidemiology: monitoring infectious disease spread and resistance to the  
457 community level. *Environ Int* 139, 105689.
- 458 Sinclair, R.G., Choi, C.Y., Riley, M.R., Gerba, C.P., 2008. Pathogen surveillance  
459 through monitoring of sewer systems. *Adv Appl Microbiol* 65, 249.
- 460 Singh, S., Kumar, V., Kapoor, D., Dhanjal, D.S., Bhatia, D., Jan, S., Singh, N., Romero,  
461 R., Ramamurthy, P.C., Singh, J., 2021. Detection and disinfection of COVID-19  
462 virus in wastewater. *Environ Chem Lett* 19, 1917–1933.
- 463 Sofia, D.R., 2020. The effect of ozonation on dissolved oxygen and microbiological  
464 content in refill drinking water, in: *IOP Conference Series: Earth and*  
465 *Environmental Science*. Institute of Physics Publishing.  
466 <https://doi.org/10.1088/1755-1315/443/1/012025>
- 467 Spurbeck, R.R., Minard-Smith, A., Catlin, L., 2021. Feasibility of neighborhood and  
468 building scale wastewater-based genomic epidemiology for pathogen surveillance.  
469 *Science of The Total Environment* 789, 147829.
- 470 Symonds, E.M., Nguyen, K.H., Harwood, V.J., Breitbart, M., 2018. Pepper mild mottle  
471 virus: a plant pathogen with a greater purpose in (waste) water treatment  
472 development and public health management. *Water Res* 144, 1–12.

- 473 Tchobanoglous, G., Burton, F.L., David Stensel, H., n.d. Wastewater Engineering  
474 Treatment and Reuse (Fourth Edition).
- 475 Thanekar, P., Gogate, P.R., 2019. Combined hydrodynamic cavitation based processes  
476 as an efficient treatment option for real industrial effluent. *Ultrason Sonochem* 53,  
477 202–213.
- 478 Wang, X.W., Li, J., Guo, T., Zhen, B., Kong, Q., Yi, B., Li, Z., Song, N., Jin, M., Xiao,  
479 W., 2005. Concentration and detection of SARS coronavirus in sewage from Xiao  
480 Tang Shan Hospital and the 309th Hospital of the Chinese People’s Liberation  
481 Army. *Water science and technology* 52, 213–221.
- 482 Weidhaas, J., Aanderud, Z.T., Roper, D.K., VanDerslice, J., Gaddis, E.B., Ostermiller,  
483 J., Hoffman, K., Jamal, R., Heck, P., Zhang, Y., 2021. Correlation of SARS-CoV-2  
484 RNA in wastewater with COVID-19 disease burden in sewersheds. *Science of The  
485 Total Environment* 775, 145790.
- 486 Young, S., Torrey, J., Bachmann, V., Kohn, T., 2020. Relationship between inactivation  
487 and genome damage of human enteroviruses upon treatment by UV254, free  
488 chlorine, and ozone. *Food Environ Virol* 12, 20–27.
- 489 Yu, Y., Xiong, Z., Huang, B., Wang, X., Du, Y., He, C., Liu, Y., Yao, G., Lai, B., 2022.  
490 Synchronous removal of pharmaceutical contaminants and inactivation of  
491 pathogenic microorganisms in real hospital wastewater by electro-peroxone  
492 process. *Environ Int* 168, 107453.  
493 <https://doi.org/https://doi.org/10.1016/j.envint.2022.107453>
- 494 Zhang, D., Ling, H., Huang, X., Li, J., Li, W., Yi, C., Zhang, T., Jiang, Y., He, Y., Deng,  
495 S., 2020. Potential spreading risks and disinfection challenges of medical  
496 wastewater by the presence of Severe Acute Respiratory Syndrome Coronavirus 2

497 (SARS-CoV-2) viral RNA in septic tanks of Fangcang Hospital. Science of the  
498 Total Environment 741, 140445.

499 Zhang, T., Breitbart, M., Lee, W.H., Run, J.-Q., Wei, C.L., Soh, S.W.L., Hibberd, M.L.,  
500 Liu, E.T., Rohwer, F., Ruan, Y., 2006. RNA viral community in human feces:  
501 prevalence of plant pathogenic viruses. PLoS Biol 4, e3.

502

503 **Table 1: Different AOPs and their possible reaction mechanism for disinfection of**  
504 **SARS-CoV-2\***

| Sr.No | Advance oxidation processes                 | Reaction for generation of oxidising agents                                                                                                                                     |
|-------|---------------------------------------------|---------------------------------------------------------------------------------------------------------------------------------------------------------------------------------|
| 1     | Ozonation                                   | $3O_3 + H_2O \rightarrow 2OH^\bullet + 4O_2$                                                                                                                                    |
| 2     | Ozonation/H <sub>2</sub> O <sub>2</sub>     | $H_2O_2 \rightarrow HO_2^- + H^+$<br>$HO_2^- + O_3 \rightarrow OH^\bullet + O_2^- + O_2$                                                                                        |
| 3     | Ozonation/UV                                | $O_3 + H_2O + hv \rightarrow H_2O_2 + O_2$<br>$H_2O_2 + hv \rightarrow 2OH^\bullet$                                                                                             |
| 4     | UV                                          | $H_2O + hv \rightarrow OH^\bullet + H^\bullet$                                                                                                                                  |
| 5     | UV/H <sub>2</sub> O <sub>2</sub>            | $H_2O_2 + hv \rightarrow 2OH^\bullet$                                                                                                                                           |
| 6     | UV/Ozonation/H <sub>2</sub> O <sub>2</sub>  | $H_2O_2 \rightarrow HO_2^- + H^+$<br>$HO_2^- + O_3 \rightarrow OH^\bullet + O_2^- + O_2$<br>$O_3 + H_2O + hv \rightarrow H_2O_2 + O_2$<br>$H_2O_2 + hv \rightarrow 2OH^\bullet$ |
| 7     | Hydrodynamic Cavitation (HC)                | $2H_2O + HC \rightarrow 2OH^\bullet + H^\bullet$                                                                                                                                |
| 8     | HC/ H <sub>2</sub> O <sub>2</sub>           | $2H_2O + HC \rightarrow 2OH^\bullet + H^\bullet$<br>$H_2O_2 \rightarrow HO_2^- + H^+$                                                                                           |
| 9     | HC/Ozonation/ H <sub>2</sub> O <sub>2</sub> | $2H_2O + HC \rightarrow 2OH^\bullet + H^\bullet$                                                                                                                                |

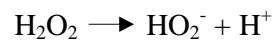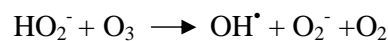

10 HC/Ozonation

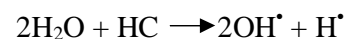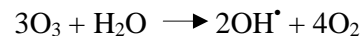

505 Note:\*This table has been obtained from (Deng and Zhao, 2015).

506

507

508

509

510 **Table 2. Physical properties of untreated and treated sewage water using AOPs**

| Physiochemical Parameters                    | TOC (ppm) | TDS (ppm) | DO (ppm) | pH  |
|----------------------------------------------|-----------|-----------|----------|-----|
| Raw sewage water                             | 27.06     | 336.4     | 5.9      | 7.5 |
| HC/Ozonation                                 | 1.13      | 253.3     | 8.38     | 9   |
| UV/Ozonation                                 | 5.58      | 261.3     | 12.7     | 8.7 |
| H <sub>2</sub> O <sub>2</sub> /Ozonation     | 1.17      | 238.7     | 13.77    | 8.8 |
| Ozonation                                    | 1.39      | 212.3     | 13.8     | 8.8 |
| UV/Ozonation / H <sub>2</sub> O <sub>2</sub> | 3.12      | 238.4     | 14.62    | 9   |
| HC/Ozonation/ H <sub>2</sub> O <sub>2</sub>  | 3.37      | 268.8     | 9.37     | 8.4 |

511

512

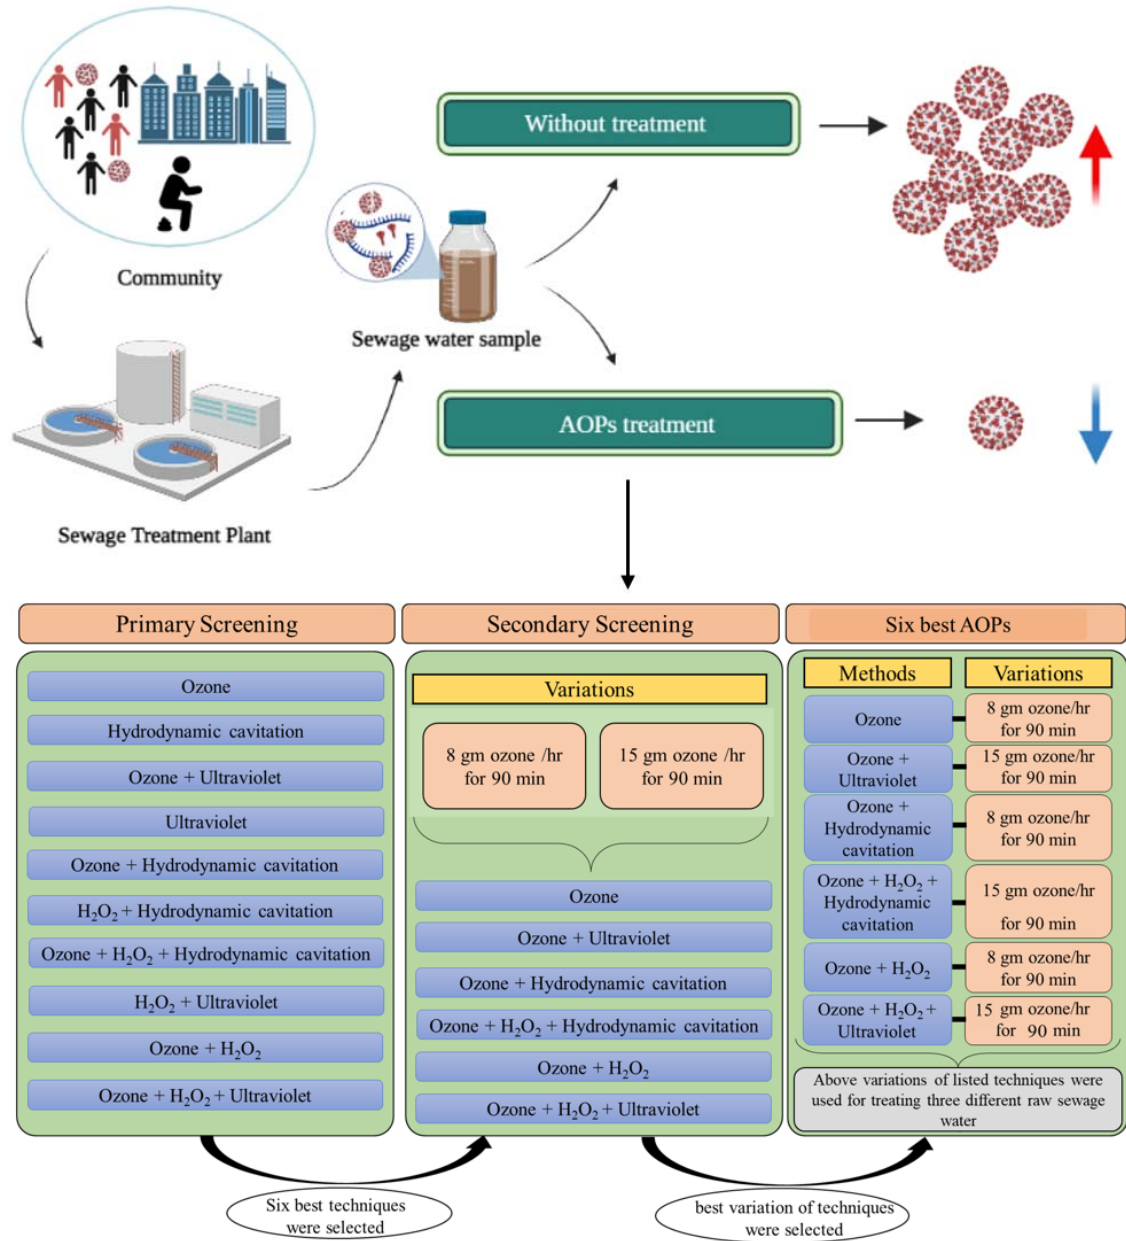

513

514

**Fig. 1. Experimental scheme illustrating treatment of raw sewage water samples**

515

**(from STP) with different treatment techniques for reduced SARS-Cov-2 viral load**

516

(Image: BioRender.com).



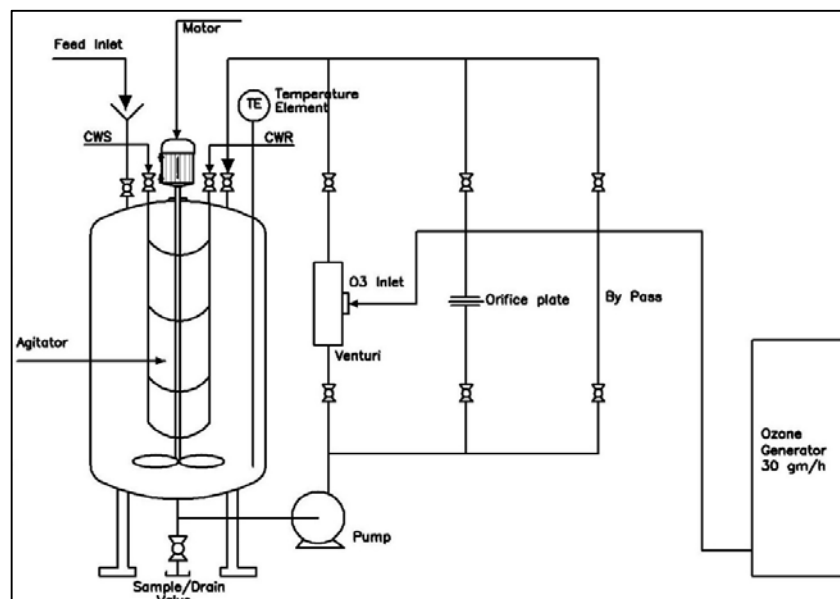

517

518

**Fig. 2. Setup for hydrodynamic cavitation and its hybrid techniques.**

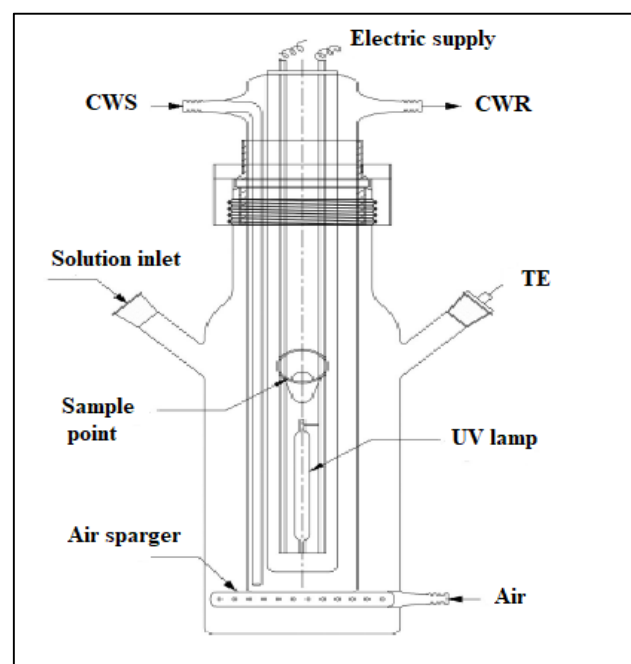

519

520

**Fig. 3. Setup for UV/ozonation and its hybrid processes.**

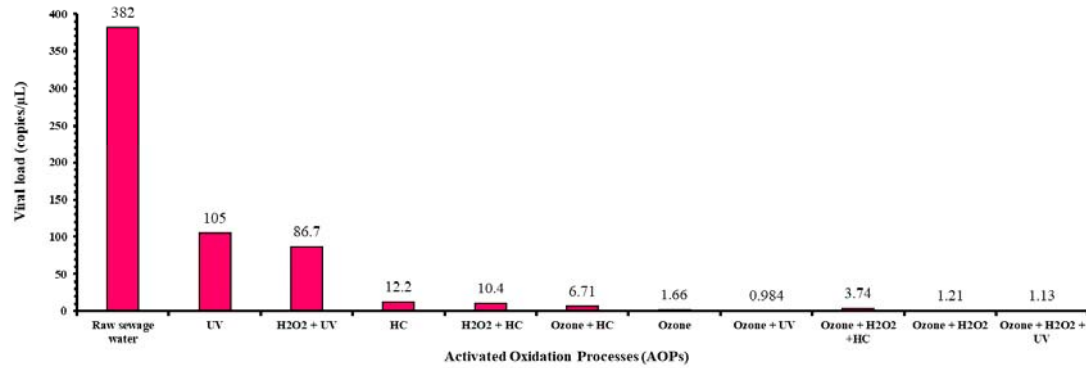

521

522 **Fig. 4. Bar plot illustrating evaluation of disinfecting efficiency of different AOPs**  
 523 **for reduced viral load.**

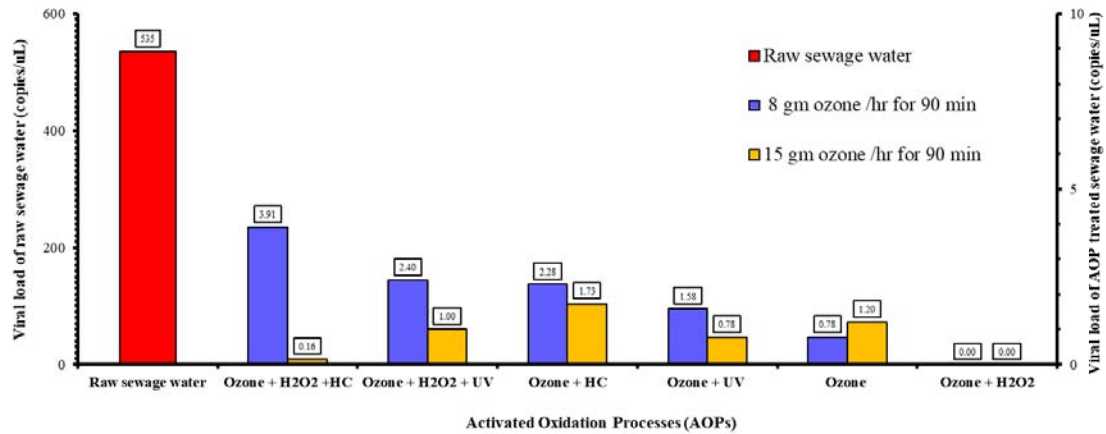

524

525 **Fig. 5. Variations of initially screened treatment techniques using raw sewage**  
 526 **water samples.** The Y-axis at the left shows the viral load (copies/μL) of raw sewage  
 527 **water (red bar), and the secondary Y-axis axis depicts the viral load (copies/μL) of AOP**  
 528 **treated sewage water.**

529

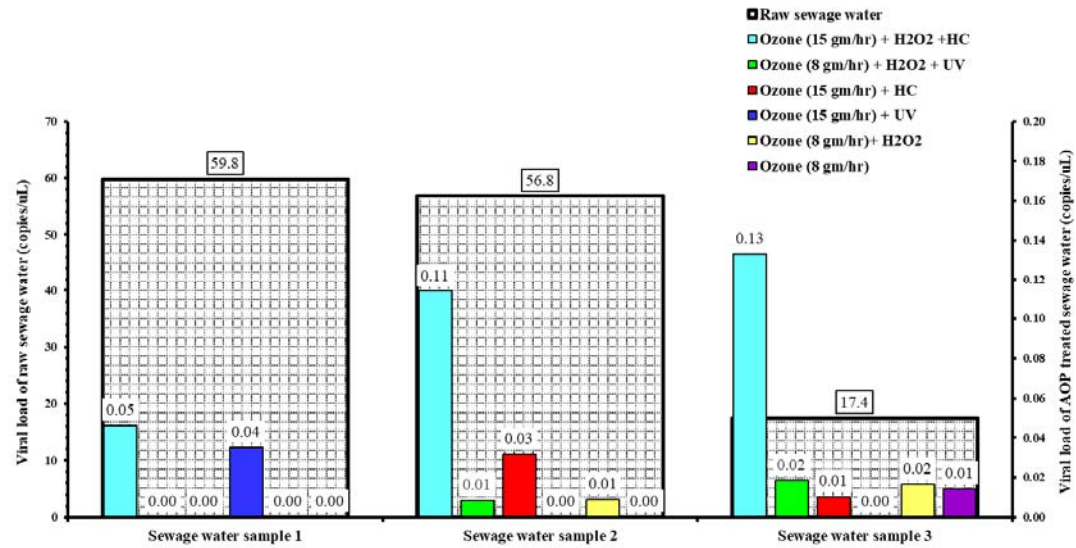

530

531

**Fig. 6. Graphical representation of the SARS-CoV-2 viral load reduction for the**

532

**three different sewage water samples collected on different days using six best AOP**

533

**techniques.** The Y-axis at the left shows the viral load (copies/μL) of raw sewage water

534

(checkered pattern bar), and the secondary axis represents the viral load (copies/μL) of

535

AOP treated water.

536

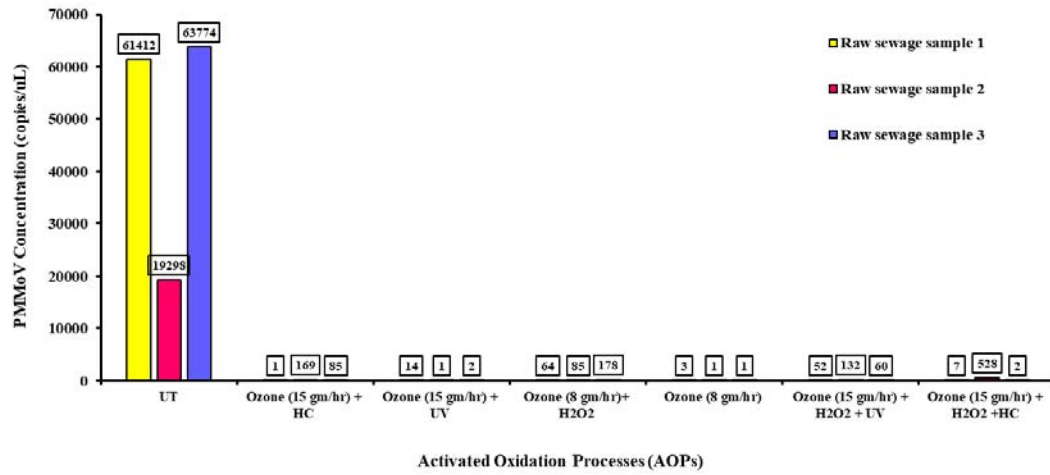

537

538 **Fig. 7. PMMoV RNA (copies/μL) reduction.** After treatment of the three different  
539 sewage water samples collected using the six best AOP techniques.

540

541

542
